# Supplementary material
Source: PubMed Central journal article supplement (PMC2754684)
Supplement: en.2009-0118_2.pdf [file en.2009-0118_2.pdf]

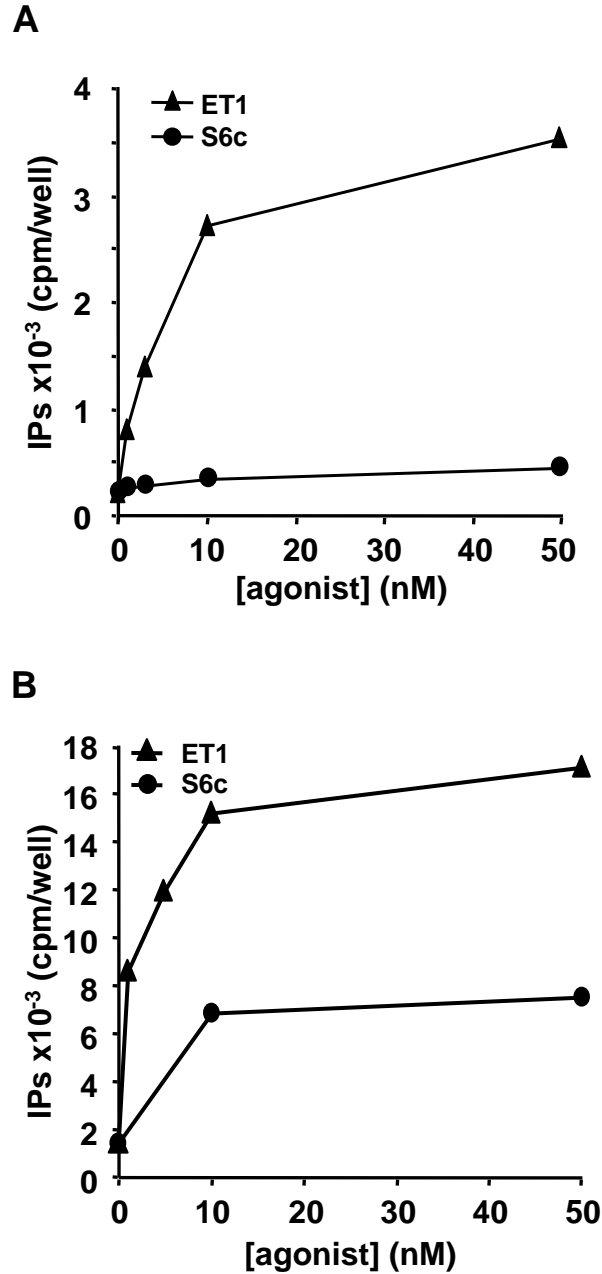

**Dose-dependent effect of ET-1 and S6C on PLC activation in normal myometrial and ELT3 cells.** [<sup>3</sup>H]inositol-labeled myometrial (A) and ELT3 (B) cells were incubated for 30 min in the presence of the indicated concentrations of ET-1 or S6c. Total [<sup>3</sup>H]IPs were determined as described in Materials and Methods. Result of a typical experiment among three performed in duplicate.
